# Supplementary material for: Fabrication of water-soluble polymer-encapsulated As4S4 to increase oral bioavailability and chemotherapeutic efficacy in AML mice
Source: PubMed Central journal article supplement (PMC4935940; doi:10.1038/srep29348), 2016-07-07
Supplement: srep29348-s1.pdf [file srep29348-s1.pdf]

# **Fabrication of water-soluble polymer encapsulated-As<sub>4</sub>S<sub>4</sub> to increase the oral bioavailability and chemotherapeutic efficacy in AML mice**

Qiang Ma<sup>#</sup>, Chuan Wang<sup>#</sup>, Xiaojin Li, Hua Guo, JieMeng, Jian Liu\* & Haiyan Xu\*

Institute of Basic Medical Sciences Chinese Academy of Medical Sciences, School of Basic Medicine  
Peking Union Medical College, Beijing 100005, P. R. China

<sup>#</sup> These authors contributed equally to this work

\* Correspondence: [xuhy@pumc.edu.cn](mailto:xuhy@pumc.edu.cn), [liujian@ibms.pumc.edu.cn](mailto:liujian@ibms.pumc.edu.cn)

Supplementary Figure S1.

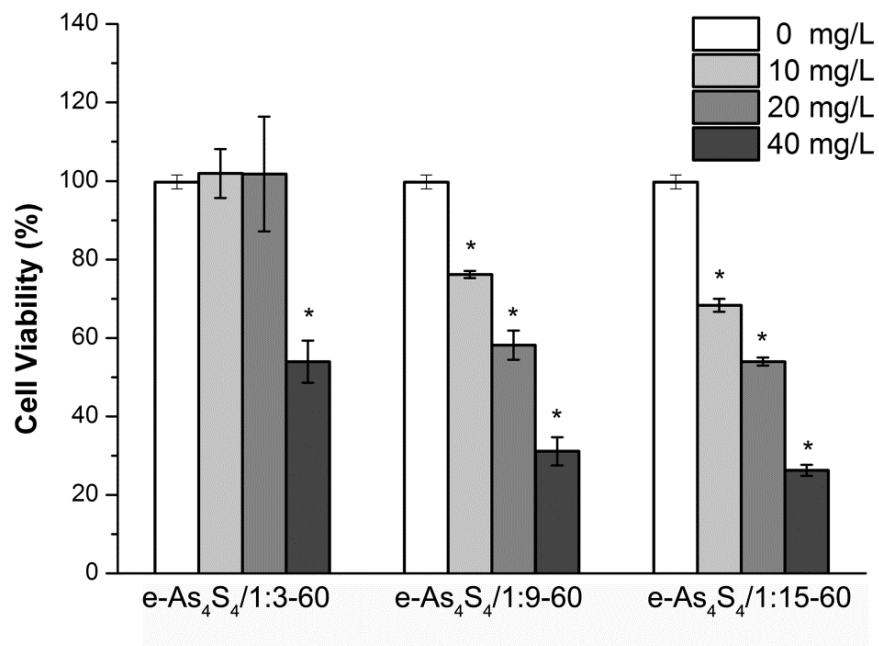

**Supplementary Figure S1. Cytotoxicity of e-As<sub>4</sub>S<sub>4</sub> on HL60 cells.** HL60 cells were treated with saline, e-As<sub>4</sub>S<sub>4</sub>/1:3-60, e-As<sub>4</sub>S<sub>4</sub>/1:9-60 and e-As<sub>4</sub>S<sub>4</sub>/1:15-60 (n=4) for 48 h. Student's *t*-test (two-tailed) was performed to assess statistical significance of experimental results vs saline (\* *P*<0.05).

Supplementary Figure S2.

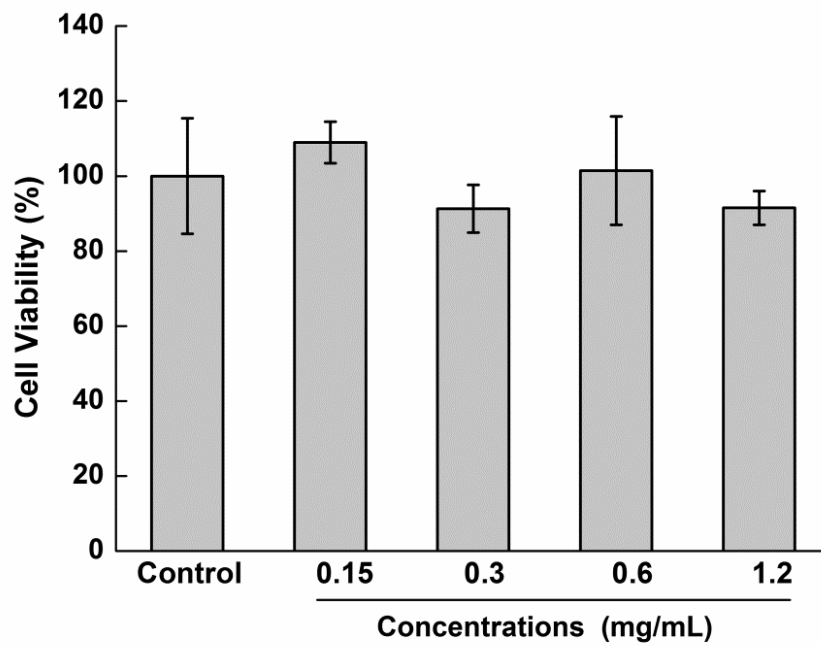

Figure S2. Cytotoxicity of PVCL-PVAc-PEG (Soluplus® ) on HL60 cells. HL60 cells were treated with PVCL-PVAc-PEG at different concentration for 72h. Student's *t*-test (two-tailed) was performed to assess statistical significance of experimental results vs saline (\*  $P < 0.05$ ).

Supplementary Figure S3.

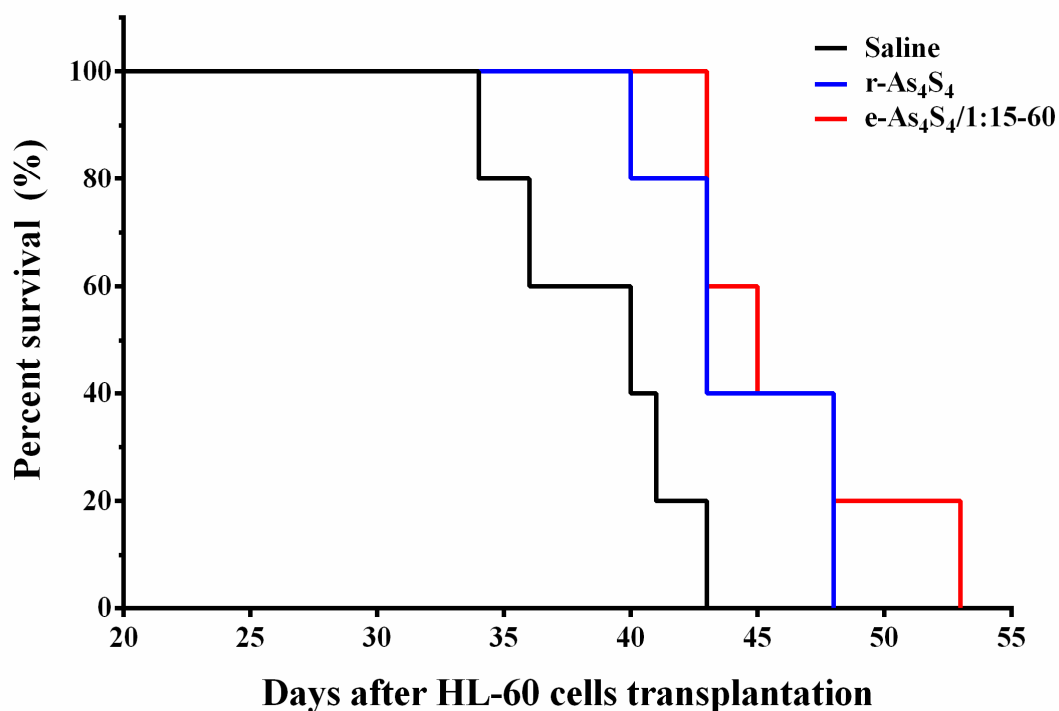

Supplementary Figure S3. *In vivo* therapeutic efficacies of the half-dose r-As<sub>4</sub>S<sub>4</sub>, e-As<sub>4</sub>S<sub>4</sub> and ATRA. Survival curve of AML mice treated with saline (blue line), r-As<sub>4</sub>S<sub>4</sub> (red line) or e-As<sub>4</sub>S<sub>4</sub>/1:15-60 (green line), n=5, Log-rank test (Mantel-Cox) was used to assess statistical significance: e-As<sub>4</sub>S<sub>4</sub> vs saline ( $P < 0.0078$ ), r-As<sub>4</sub>S<sub>4</sub> vs saline ( $P = 0.042$ ), e-As<sub>4</sub>S<sub>4</sub> vs r-As<sub>4</sub>S<sub>4</sub> ( $P = 0.4803$ ). NOD/SCID mice were following intravenously injected with HL-60 cells ( $1 \times 10^6$  cells per mouse) after 250 cGy  $\gamma$ -irradiation. After 20 days, the treatment was started with intragastric administration of saline, r-As<sub>4</sub>S<sub>4</sub> (1.8 mg per mouse per day) or e-As<sub>4</sub>S<sub>4</sub>/1:15-60 (28.8 mg per mouse per day).
